# Supplementary material
Source: publisher figshare collection journal article supplement (https://rs.figshare.com/ndownloader/files/16838678)
Supplement: Supplementary file 1 [file 16838678]

SUPPORTING INFORMATION FOR

**A seed flying like a bullet: Ballistic seed dispersal in Chinese witch-hazel**  
(*Hamamelis mollis* OLIV., Hamamelidaceae)

Simon Poppinga, Anne-Sophie Böse, Robin Seidel, Linnea Hesse, Jochen Leupold,  
Sandra Caliaro, Thomas Speck

*Journal of the Royal Society Interface*

**Table S3: Detailed results of seed rotation during ejection.** In test series A, seeds were ejected from whole fruits, whereas in test series B seeds were ejected from cleared endocarps. Abbreviations (the terminology is based on hypothetical frontal views on the flying seeds): cwr = clockwise rotating; c-cwr = counter-clockwise rotating; w = wobbling.

| Test series & specimen                  | Direction of rotation                                                                                |
|-----------------------------------------|------------------------------------------------------------------------------------------------------|
| <b>A01</b>                              | c-cwr                                                                                                |
| <b>A02</b>                              | cwr                                                                                                  |
| <b>A03</b>                              | c-cwr                                                                                                |
| <b>A04</b>                              | c-cwr                                                                                                |
| <b>A05</b>                              | c-cwr                                                                                                |
| <b>A06</b>                              | cwr                                                                                                  |
| <b>A07</b>                              | c-cwr                                                                                                |
| <b>A08</b>                              | cwr                                                                                                  |
| <b>A09</b>                              | w                                                                                                    |
| <b>A10</b>                              | cwr                                                                                                  |
| <i>Percentages of d, u, t (A)</i>       | $4 \times \text{cwr} = 40\%$<br>$5 \times \text{c-cwr} = 50\%$<br>$1 \times w = 10\%$                |
| <b>B01</b>                              | c-cwr                                                                                                |
| <b>B02</b>                              | c-cwr                                                                                                |
| <b>B03</b>                              | cwr                                                                                                  |
| <b>B04</b>                              | cwr                                                                                                  |
| <b>B05</b>                              | c-cwr                                                                                                |
| <b>B06</b>                              | c-cwr                                                                                                |
| <b>B07</b>                              | c-cwr                                                                                                |
| <b>B08</b>                              | cwr                                                                                                  |
| <b>B09</b>                              | cwr                                                                                                  |
| <i>Percentages of d, u, t (B)</i>       | $4 \times \text{cwr} \sim 44.4\%$<br>$5 \times \text{c-cwr} \sim 55.6\%$                             |
| <i>Percentages of d, u, t (A&amp;B)</i> | $8 \times \text{cwr} \sim 42.1\%$<br>$10 \times \text{c-cwr} \sim 52.6\%$<br>$1 \times w \sim 5.3\%$ |
